# Supplementary material
Source: MDPI journal article supplement (https://www.mdpi.com/2071-1050/9/12/2262)
Supplement: s1 [file s1]

# Proofreading

Page 1

Zip code added and relocated-03188(first author), 38453(second author)

Page 2

similar -> similar

Page 4

consumers gradually believe that the hotel is trustworthy in purchase decision.

**Commented [TW1]:** This doesn't follow from the first half of the sentence. I am not sure what you want to say. Please revise this and possibly separate into two sentences.

→

consumers normally have a more cautious behavior to book a hotel

**Commented [TW2]:** This doesn't follow from the first half of the sentence. I am not sure what you want to say. Please revise this and possibly separate into two sentences.

Page 6

Removed the bold from the items names of the Table 1.

three -> four

Page 7

Removed the italics.

Page 8

Removed the bold

Removed \* in the Note, and \*\* in the Legend

Page 9

variances explained ranges -> variance explained

R-squared value -> R<sup>2</sup> value

The final dependent construct explained 50.2% of intention to book. The intermediate variable was 36.0% of perceived value and 6.0% of trust toward hotels for the total sample of data.

- Divided into two sentences.

Commented [TW3]: Please unify capitalization throughout and remove where possible.

Page 10

Added;

**Author Contributions:** Seo Yeon Kim had developed the proposed research model by reviewing relevant literature, analysed the data, and wrote the paper; Jong Uk Kim and Sang Cheol Park designed the research, analysed the data, contributed to develop both research and practical implications in the paper, and revised the manuscript.

**Conflicts of Interest:** The authors declare no conflict of interest.

Commented [M4]: Please add the information.

Page 11

October 2017 -> 10 October 2017

Reference 8 has been replaced.

Krasna, T. The Influence of Perceived Value on Customer Loyalty in Slovenian Hotel Industry. *Turizam* 2008, 12, 12–15.

→

Chiang, C.; Jang, S.S. T. The Effects of Perceived Price and Brand Image on Value and Purchase Intention: Leisure traveller's attitudes toward online hotel booking. *J. Hosp. Leis. Mark.*, 2007, 15, 49–69.
